# Supplementary material for: Biochemical Recurrence in Prostate Cancer Is Associated with the Composition of Lactobacillus: Microbiome Analysis of Prostatic Tissue
Source: MDPI journal article supplement (doi:10.3390/ijms241310423), 2023-06-21
Supplement: s1 [file s1]

## Supplementary data

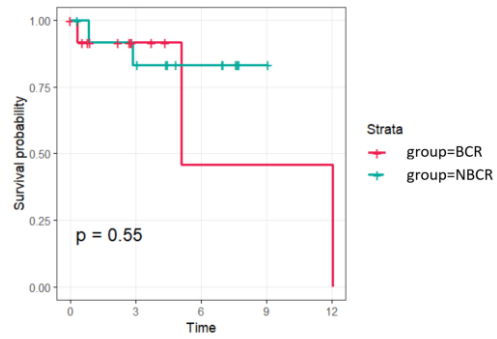

**Figure S1.** Kaplan–Meier survival analysis for biochemical recurrence (BCR) and with no biochemical recurrence (NBCR) .

**Table S1.** Clinical characteristics of patients analyzed in this study.

|                     | NBCR (n=13)                                          | BCR (n=13)                                        | P value |
|---------------------|------------------------------------------------------|---------------------------------------------------|---------|
| Age                 | 73                                                   | 72                                                | 0.6084  |
| PSA                 | 13.5±4.5                                             | 14.9±6.6                                          | 0.8570  |
| Gleason score       |                                                      |                                                   |         |
| Median              | 7                                                    | 7                                                 | 0.7213  |
| Range               | 6-9                                                  | 5-9                                               |         |
| Gleason grade       |                                                      |                                                   |         |
| Median              | 2                                                    | 2                                                 | 1.0000  |
| range               | 1-4                                                  | 1-4                                               |         |
| Risk stratification | Low risk = 4<br>Intermediate risk =7<br>High risk =2 | Low risk=3<br>Intermediate risk=5<br>High risk =5 | 0.4137  |
| Pathologic T stage  | T1= 4<br>T2= 4                                       | T1= 7<br>T2= 1                                    | 0.3591  |

---

BCR= Biochemical recurrence; NBCR= No biochemical recurrence.

**Table S2. Averaged taxonomic composition for the biochemical recurrence group or no biochemical recurrence group.**

| Taxon rank | Taxon name             | BCR  | NBCR | p-value |
|------------|------------------------|------|------|---------|
| Phylum     | Proteobacteria         | 42.6 | 49.7 | N.S.    |
|            | Actinobacteria         | 6.5  | 8.2  | N.S.    |
|            | Bacteroidetes          | 26.0 | 19.1 | N.S.    |
|            | Firmicutes             | 24.4 | 22.3 | N.S.    |
|            | ETC(<1%)               | 0.5  | 0.7  |         |
| Class      | Alphaproteobacteria    | 15.3 | 21.2 | N.S.    |
|            | Bacteroidia            | 25.4 | 18.5 | N.S.    |
|            | Bacilli                | 4.7  | 5.2  | N.S.    |
|            | Actinobacteria c       | 6.5  | 8.1  | N.S.    |
|            | Gammaproteobacteria    | 11.3 | 13.5 | N.S.    |
|            | Betaproteobacteria     | 16.0 | 14.9 | N.S.    |
|            | Clostridia             | 19.4 | 16.9 | N.S.    |
|            | ETC(<1%)               | 1.4  | 1.6  |         |
|            |                        | 7.4  | 6.6  | N.S.    |
| Order      | Pseudomonadales        | 7.4  | 6.6  | N.S.    |
|            | Bacteroidales          | 25.4 | 18.5 | N.S.    |
|            | Enterobacteriales      | 1.2  | 1.5  | N.S.    |
|            | Burkholderiales        | 15.5 | 14.5 | N.S.    |
|            | Corynebacteriales      | 2.5  | 5.3  | N.S.    |
|            | Clostridiales          | 19.4 | 16.9 | N.S.    |
|            | Propionibacteriales    | 3.1  | 1.9  | N.S.    |
|            | Rhizobiales            | 13.7 | 18.1 | N.S.    |
|            | Bacillales             | 1.5  | 1.3  | N.S.    |
|            | Xanthomonadales        | 2.2  | 5.0  | N.S.    |
|            | Lactobacillales        | 3.2  | 3.9  | N.S.    |
|            | Sphingomonadales       | 0.0  | 1.6  | N.S.    |
|            | ETC(<1%)               | 4.8  | 5.0  |         |
|            |                        | 21.7 | 15.7 | N.S.    |
|            | Muribaculaceae         | 1.2  | 0.0  | N.S.    |
|            | Staphylococcaceae      | 1.2  | 0.0  | N.S.    |
|            | Comamonadaceae         | 14.9 | 12.6 | N.S.    |
|            | Christensenellaceae    | 4.8  | 4.2  | N.S.    |
| Family     | Xanthomonadaceae       | 2.2  | 5.0  | N.S.    |
|            | Bacteroidaceae         | 1.9  | 1.9  | N.S.    |
|            | Streptococcaceae       | 2.2  | 2.8  | N.S.    |
|            | Prevotellaceae         | 1.6  | 0.0  | N.S.    |
|            | Bradyrhizobiaceae      | 13.3 | 17.7 | N.S.    |
|            | Propionibacteriaceae   | 3.1  | 1.9  | N.S.    |
|            | Lachnospiraceae        | 1.8  | 1.6  | N.S.    |
|            | Yersiniaceae           | 1.1  | 1.4  | N.S.    |
|            | Corynebacteriaceae     | 1.6  | 1.6  | N.S.    |
|            | Ruminococcaceae        | 12.7 | 11.0 | N.S.    |
|            | Moraxellaceae          | 6.7  | 5.2  | N.S.    |
|            | Lawsonella f           | 0.0  | 2.1  | N.S.    |
|            | Sphingomonadaceae      | 0.0  | 1.4  | N.S.    |
|            | Mycobacteriaceae       | 0.0  | 1.6  | N.S.    |
|            | Pseudomonadaceae       | 0.0  | 1.4  | N.S.    |
|            | ETC(<1%)               | 9.0  | 10.9 |         |
|            |                        | 3.0  | 1.9  | N.S.    |
|            | Cutibacterium          | 1.9  | 4.0  | N.S.    |
|            | Stenotrophomonas       | 4.9  | 3.4  | N.S.    |
|            | Oscillibacter          | 10.8 | 8.9  | N.S.    |
|            | PAC000186 g            | 1.6  | 0.0  | N.S.    |
|            | Prevotella             | 1.8  | 1.5  | N.S.    |
|            | PAC001127 g            | 1.1  | 1.4  | N.S.    |
|            | Serratia               | 1.9  | 1.9  | N.S.    |
|            | Bacteroides            | 1.3  | 1.2  | N.S.    |
|            | Christensenellaceae uc | 1.2  | 0.0  | N.S.    |
|            | PAC001063 g            | 2.2  | 2.7  | N.S.    |
|            | Streptococcus          | 1.6  | 1.5  | N.S.    |
|            | Corynebacterium        | 6.6  | 6.3  | N.S.    |
|            | Pseudoflavonifractor   | 1.9  | 1.7  | N.S.    |
|            | PAC001360 g            | 2.9  | 2.4  | N.S.    |
|            | PAC001066 g            | 2.9  | 3.8  | N.S.    |
| Genus      | Afipia                 | 2.6  | 0.0  | N.S.    |
|            | PAC001068 g            | 14.5 | 11.3 | N.S.    |
|            | Pelomonas              | 6.3  | 4.6  | N.S.    |
|            | Enhydrobacter          | 10.3 | 13.8 | N.S.    |
|            | Bradyrhizobium         | 0.0  | 1.3  | N.S.    |
|            | Pseudomonas            | 0.0  | 2.1  | N.S.    |
|            | Lawsonella             | 0.0  | 1.6  | N.S.    |
|            | Mycobacterium          | 0.0  | 1.4  | N.S.    |
|            | Sphingomonas           | 0.0  | 1.1  | N.S.    |
|            | JZUE g                 | 0.0  |      |         |
|            | ETC(<1%)               | 18.7 | 20.2 |         |

Relative abundances less than 1 % were expressed as ETC. Wilcoxon rank-sum test was used to analyze the significance between the two groups. N.S. Not significant.
